# Supplementary material
Source: publisher site journal article supplement (https://www.dovepress.com/article/206111)
Supplement: Supplementary file 1 [file get_supplementary_file.php]

**Supplementary materials**

# Study design


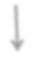

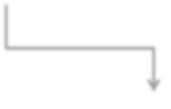

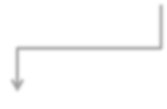

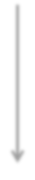

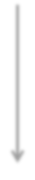

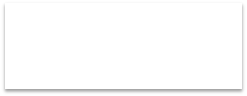

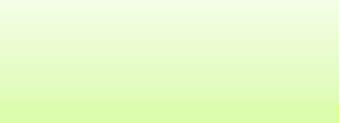

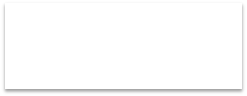

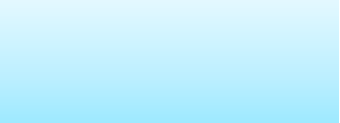

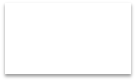

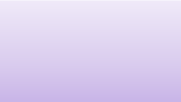

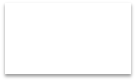

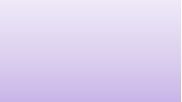

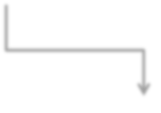

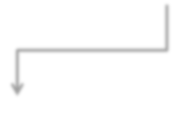

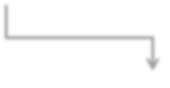

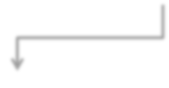

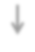

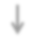

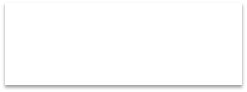

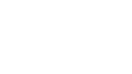

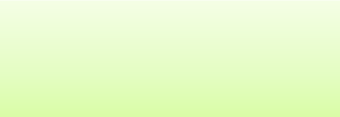

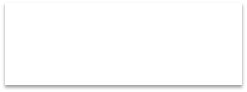

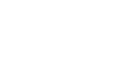

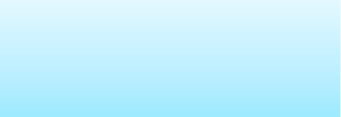

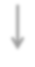

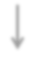


Screening

Verification of Inclusion/exclusion criteria, screening, written informed consent

Inclusion

Randomization: Fax to the clincial trial centre Leipzig

*Arm1 Arm2*

*1 : 1*

***Baseline***

*and* ***NHF-****initiation*

*Delay : max. 10 days*

***Baseline***

*and* ***NIV-****initiation*

*Delay : max. 10 days*

***6 weeks of NHF*** *therapy*

***6 weeks of NIV*** *therapy*

*Extension: max. 5 days Extension: max. 5 days*

Therapy

***VISIT 1*** *:*

*Examination and initiation*

*of NIV*

***VISIT 1*** *:*

*Examination and initiation*

*of NHF*

*Delay: max. 10 days Delay: max. 10 days*

***6 weeks of NIV*** *therapy*

***6 weeks of NHF*** *therapy*

*Extension: max. 5 days Extension: max. 5 days*

***End of study Routine care***

***VISIT 2:***

*Examination und decision regarding further therapy*

NHF NIV

# Inclusion and exclusion criteria

## Inclusion

- 1. COPD with chronic global respiratory insufficiency
  2. stable daytime hypercapnia
     1. pCO2 *≥* 50 mmHg and typical symptoms of ventilatory insuffi- ciency

or

- - 1. exacerbation with documented hypercapnia *≥* 50 mmHg
  1. at least 18 years of age
  2. patient or caregiver must be able to operate the devices after receiving instructions
  3. patient must be willing to use the NHF and NIV devices for at least 5 hours/day throughout the trial
  4. patient must be able and willing to fill out questionnaires
  5. informed consent has been obtained

## Exclusion

1. acute respiratory insufficiency
2. type I or type II exacerbation within the last 4 weeks (counted from the end of the exacerbation)
   1. exception: inclusion crterion 2b holds
3. conservative therapy including LTOT according to the GOLD update from 2011 has not been exhausted
4. prior therapy with NIV in the last 14 days
5. clinically unstable or acute illness (e.g. acute heart attack, atrial tach- yarrhythmia)
6. congestive heart failure (e.g. lower leg edema, pleural effusions)
7. other severe concomitant diseases, as assessed by the treating physician
8. contraindication for NIV
9. known or suspected obstructive sleep apnoea syndrome
10. relevant systemic infections, as assessed by the treating physician
11. BMI *>* 30 kg/m2
12. further lung diseases of other aetiology or diseases that could impend breathing (e.g. cystic fibrosis, scoliosis, muscle diseases)
13. non-compliance
14. participation in other interventional trials
15. pregnant or nursing women
16. women of child bearing age (*<* 2 years after last menstruation) without appropriate contraceptive measures during the trial (implants, injec- tions, oral contraceptives, intrauterine devices – spirals etc., partner has vasectomy)

# Details of NIV devices

Supplementary Table 1: List and frequency of NIV device use

| Device name | company | n |
| --- | --- | --- |
| S9 VPAP | ResMed | 31 |
| BiPAP A30 | L¨owenstein Medical Homecare | 18 |
| Vivo 40 | L¨owenstein Medical Homecare | 6 |
| PB520 | Covidien | 5 |
| VSIII | ResMed | 3 |
| Stellar 100 | ReMed | 2 |
| Vivo 50 | L¨owenstein Medical Homecare | 2 |
| PB560 | Covidien | 1 |
| Ventimotion 2 | L¨owenstein Medical Homecare | 1 |
| Vivo 30 | L¨owenstein Medical Homecare | 1 |
| other/unknown |  | 11 |

# Methods: Endpoint Measurement and Sta- tistical Methods

## Blood Gas Analysis

Capillary blood gases were taken from the arterialized earlobe 10 minutes af- ter treatment with a hyperemia inducing ointment (Finalgon*Q*R , Boehringer Ingelheim Pharma GmbH & Co. KG, Ingelheim am Rhein, Germany). Cap- illary blood gases were taken 3 hours after the end of NIV/NHF treatment, at the earliest.

## Spirometry and Six Minute Walking Test

At all study visits, patients underwent lung function tests including a p0.1 test and 6MWT. All tests were performed according to ATS/ERS criteria.

## Health Related Quality of Life

The St. George Respiratory Questionnaire (SGRQ) and the Severe Respira- tory Insufficiency Questionnaire (SRI) were used to measure health related quality of life. The summary scale of the SGRQ ranges from 0 to 100, with higher scores corresponding to worse quality of life. According to Jones and co-workers, a difference in the total SGRQ score of approximately four points indicates a minimally important difference while differences greater than seven points can be considered large. However, a more recent publi- cation suggests that five to eight points constitute a minimally important difference.1, 2 The SRI also has a summary score ranging from 0 to 100, but with higher scores corresponding to better quality of life. It comprises seven sub-scales (respiratory complaints, physical functions, attendant symptoms and sleep, social relationships, psychological well-being, social functioning).3 The Modified Borg Dyspnea Scale is a one-item scale for the rating of perceived exertion. It has a score ranging from 0 to 10, with higher values representing stronger exertion.4 Furthermore, patients were asked to describe their current state of health on a Visual Analogue Scale (VAS) ranging from “worst imaginable” (0 cm) to “best imaginable” (10 cm). Finally, patients were asked to assess the device they had used during the last six weeks of treatment as “very good” (1), “good” (2), “satisfactory” (3), “unsatisfactory”

(4), or “unacceptable” (5).

## Details of Statistical Methods

The per protocol set consists of patients who matched the inclusion/exclusion criteria, attended each study visit for adjusting the settings of the devices, had at most a 10 day delay between study visit and start of treatment, and are not known to have used a device for less than 42 h in the 6 weeks of treatment. Patients who died during the trial are included in the per protocol analysis to avoid bias.

Missing data were accounted for using multiple imputation from the pack- age “mice”5 with m = 50 sets using predictive mean matching. Imputation for the primary endpoint used the baseline value, sex, age, COPD assessment test score, smoking status, forced expiratory pressure in 1 second (FEV1), P01, 6MWT, and residual volume in the predictor matrix. Imputation of other parameters followed a similar strategy.

# Exploratory analysis of factors affecting changes in pCO2

A mixed linear model was analysed with ∆pCO2 as the dependent variable, patient as a random term and baseline pCO2, device, age, sex, BMI cat- egory, exacerbation history, time since last exacerbation, respiratory rate, CAT score and six minute walking test as fixed effects. Other than baseline pCO2 (p = 0.042), none of these covariates was found to be significantly associated with change in pCO2, and no other p-value was smaller than 0.18.

There were three patients whose pCO2 values increased by more than 5 mm Hg with both devices, five only using NHF and four using NIV. These twelve patients were of similar age to the remainder (63.3 vs 65.6, p=0.35), had slightly, but not significantly more exacerbations in the last 12 months

(3.1 vs 1.6, p=0.16). Despite the general dependence on baseline pCO2 values mentioned above, these particular patients had baseline values that were compparable to those of the remaining patients (55.5 mm Hg vs 56.6. mm Hg, p=0.44).

In all, it does not seem easy to predict which patients will show poor response to therapy nor to identify the extreme cases of patients, who may even deteriorate during therapy.

# Concomitant Diseases and Medication

Supplementary Table 2: Concomitant diseases. Values are numbers (%).

|  | All patients (n=94) |
| --- | --- |
| Myocardial infarction | 8 (9%) |
| Heart failure | 14 (15%) |
| Peripheral artery disease | 8 (9%) |
| Hypertension* | 65 (70%) |
| Cerebrovascular disease or dementia | 5 (5%) |
| Rheumatism | 3 (3%) |
| Skeletal or muscular disorders | 14 (15%) |
| Osteoporosis | 21 (22%) |
| Diabetes mellitus | 19 (20%) |
| Pulmonary embolism | 2 (2%) |
| Pulmonary hypertension | 13 (14%) |
| Pulmonary fibrosis | 0 (0%) |
| Depression | 12 (13%) |
| * Data unavailable for one patient. |  |

Supplementary Table 3: Medication at baseline

N (%)

| Inhaled corticosteroids | 56 (60%) |
| --- | --- |
| Long-acting beta-agonists | 74 (79%) |
| Long-acting muscarinic antagonists | 81 (86%) |
| Oral corticosteroids | 26 (28%) |
| Phosphodiesterase (PDE 4) inhibitor | 16 (17%) |
| Mucolytes | 15 (16%) |
| Short-acting beta-agonists | 56 (60%) |
| Short-acting muscarinic antagonists | 43 (46%) |
| Theophylline | 12 (13%) |

# Details Regarding the Deaths During the Trial

Four patients died during the trial, two while using NHF and two while using NIV. One was a 48 year old male, who first received NHF, crossed over as planned to NIV, and died of unknown causes about five weeks later. An 82 year old male began with NIV, crossed over as planned to NHF, and died following exacerbation with right heart decompensation two weeks later. An 83 year old woman began with NHF, crossed over as planned to NIV, and died of pneumonia following exacerbation about three weeks later. A 75 year old woman received NHF and died at home of a myocardial infarction about 2 weeks later.

# Device usage

NHF: mean device use = 5.2 h/day (n = 70) NIV: mean device use = 3.9 h/day (n = 54)

20

Paired difference in device use = 1.6 (95% CI 0.9 to 2.4) h/day, p < 0.001, (n = 47)

Number of patients

10

15

NHF NIV

0•2 2•4 4•6 6•8 8•10 10•12

0

5

Mean device use per day (hours)

Supplementary Figure 1: Daily use of the nasal high flow (NHF) and non- invasive ventilation (NIV) masks are shown. Data are unavailable in some patients primarily for purely technical reasons.

# References

[1] P W Jones, F H Quirk, and C M Baveystock. The St George’s Respiratory Questionnaire. *Respir Med*, 85 Suppl B:25–31, Sep 1991.

[2] P W Jones, F H Quirk, C M Baveystock, and P Littlejohns. A self- complete measure of health status for chronic airflow limitation. The St. George’s Respiratory Questionnaire. *Am. Rev. Respir. Dis.*, 145(6):1321– 1327, Jun 1992.

[3] W Windisch, K Freidel, B Schucher, H Baumann, M Wiebel, H Matthys, and F Petermann. The Severe Respiratory Insufficiency (SRI) Ques- tionnaire: a specific measure of health-related quality of life in patients receiving home mechanical ventilation. *J Clin Epidemiol*, 56(8):752–759, Aug 2003.

[4] G A Borg. Psychophysical bases of perceived exertion. *Med Sci Sports Exerc*, 14(5):377–381, 1982.

[5] Stef van Buuren and Karin Groothuis-Oudshoorn. mice: Multivariate imputation by chained equations in R. *Journal of Statistical Software*, 45(3):1–67, 2011.
